# Supplementary material for: Highly efficient and stable Cs2TeCl6:Cr3+ perovskite microcrystals for white light emitting diodes
Source: Royal Society of Chemistry journal article supplement (doi:10.1039/d2tc05153b), 2023-01-01
Supplement: d2tc05153b1.pdf [file d2tc05153b1.pdf]

## Supporting Information

# Highly Efficient and Stable Cs<sub>2</sub>TeCl<sub>6</sub>:Cr<sup>3+</sup> Perovskite Microcrystals for White Light Emitting Diodes

Lu Zi,<sup>a</sup> Wen Xu,<sup>\*ab</sup> Zhijiang Song,<sup>c</sup> Rui Sun,<sup>a</sup> Sen Liu,<sup>a</sup> Tianyu Xie,<sup>a</sup> Jinyang Zhu,<sup>c</sup>  
Siyu Lu,<sup>d</sup> and Hongwei Song<sup>\*a</sup>

<sup>a</sup> State Key Laboratory on Integrated Optoelectronics, College of Electronic Science and Engineering, Jilin University, Changchun, 130012, Jilin, P. R. China.

<sup>b</sup> Key Laboratory of New Energy and Rare Earth Resource Utilization of State Ethnic Affairs Commission, Key Laboratory of Photosensitive Materials & Devices of Liaoning Province, School of Physics and Materials Engineering, Dalian Minzu University, 18 Liaohe West Road, Dalian, 116600, P. R. China.

<sup>c</sup> State Centre for International Cooperation on Designer Low-Carbon & Environmental Materials, School of Materials Science and Engineering, Zhengzhou University, Zhengzhou 450000, P. R. China.

<sup>d</sup> Green Catalysis Center, and College of Chemistry, Zhengzhou University, Zhengzhou 450000, P. R. China.

\*E-mail: Prof. Wen Xu ([xuwen@dlnu.edu.cn](mailto:xuwen@dlnu.edu.cn)); Prof. Hongwei Song ([songhw@jlu.edu.cn](mailto:songhw@jlu.edu.cn))

## **Experimental section**

### **Chemicals**

Cesium chloride (CsCl, 99.9%), hydrochloric acid (HCl, 37 wt% in water, Sinopharm Chemical Reagent Co., Ltd.), tellurium dioxide (TeO<sub>2</sub>, 99.99%), bismuth chloride (BiCl<sub>3</sub>, 99%), manganese chloride tetrahydrate (MnCl<sub>2</sub>·4H<sub>2</sub>O, 99%), chromium chloride hexahydrate (CrCl<sub>3</sub>·6H<sub>2</sub>O, 99%), cadmium chloride hemi (CdCl<sub>2</sub>·5/2H<sub>2</sub>O, 98%), isopropyl alcohol, acetone (≥ 99.5%) and acetonitrile were purchased from Macklin. (CH<sub>3</sub>COO)<sub>3</sub>Ce·xH<sub>2</sub>O (99.9%), (CH<sub>3</sub>COO)<sub>3</sub>Sm·xH<sub>2</sub>O (99.9%), (CH<sub>3</sub>COO)<sub>3</sub>Eu·xH<sub>2</sub>O (99.9%), (CH<sub>3</sub>COO)<sub>3</sub>Yb·4H<sub>2</sub>O (99.9%) were purchased from Sigma-Aldrich. All chemicals were used as received without any further purification.

### **Synthesis of Cr<sup>3+</sup> doped Cs<sub>2</sub>TeCl<sub>6</sub> microcrystals (MCs)**

The Cs<sub>2</sub>TeCl<sub>6</sub>:Cr<sup>3+</sup> MCs were synthesized via a solvothermal method with some modification.<sup>[1-2]</sup> 2 mmol CsCl, 1 mmol TeO<sub>2</sub> and a certain amount of CrCl<sub>3</sub>·6H<sub>2</sub>O were dissolved in 5 ml HCl and then stirred overnight at 30°C and transferred to a polytetrafluoroethylene (PTFE) container. Subsequently, the container was placed in the oven at 180 °C for 12 hours, it was cooled to room temperature at 6-8 °C/h. The products were centrifugation, washed with isopropyl alcohol, acetone and acetonitrile in sequence. Finally, the Cs<sub>2</sub>TeCl<sub>6</sub>:Cr<sup>3+</sup> MCs were dried at 60 °C in a vacuum oven for 24 h before use.

### **Fabrication of WLEDs**

The WLEDs were constructed using commercial UV LED chip (382 nm), yellow phosphor (Cs<sub>2</sub>TeCl<sub>6</sub>:Cr<sup>3+</sup> MCs), and blue phosphor (BaMgAl<sub>10</sub>O<sub>17</sub>:Eu<sup>2+</sup> MCs). The

two phosphors are thoroughly mixed with epoxy resin and then coated on the UV LED chips, finally solidified at 80 °C for 1 hour to fabricate the WLEDs.

### **Characterization**

UV-visible absorption spectra were obtained with a Shimadzu UV-1700 PC UV/Visible scanning spectrophotometer in the range from 300 nm to 1100 nm. Powder X-ray diffraction (XRD) patterns were recorded by using a Rigaku TTRIII X-ray diffractometer at 200 mA and 40 kV with Cu K $\alpha$  radiation ( $\lambda = 1.5406 \text{ \AA}$ ). The scan range was set from 5° to 70° with the scanning rate of 10°/min. The morphology of the products was recorded with a JEOL JSM-7500F scanning electron microscope (SEM) equipped with energy dispersive X-ray spectroscopy (EDS) analysis and mapping. Trace-Metal Analysis was carried out using inductively coupled plasma optical emission spectrometry (ICP-OES) on a Varian720-ES ICP-optical emission spectrometer. The X-ray photoelectron spectroscopy (XPS) was performed on the Kratos Axis Ultra DLD spectrometer equipped with a monochrome Al K $\alpha$  X-ray source ( $h\nu = 1486.6 \text{ eV}$ ), which was operated by a drive power of 150 W with a multichannel plate and a delay line detector under  $1.0 \times 10^{-9}$  Torr vacuum. Photoluminescence spectra were recorded on a Shimadzu RF-6000 spectrofluorometer. The PL decay curves were measured on a FLS 920-stm spectrometer Edinburgh Instruments and collected by PerkinElmer LS 55 fluorescence spectrometer. The PLQY of the samples were acquired using a fluorescence spectrofluorometer (FLS980, Edinburgh Instruments) equipped with an integrating sphere. All of the measurements were performed at room temperature.

## Supplementary Figures and Tables:

**Table S1** The data of metal ions (M) mole percent (mol %) in Cs<sub>2</sub>TeCl<sub>6</sub>:M MCs measured by ICP-OES.

| Sample | M:(Te+M) | Nominal/mol% | Actual/mol% |
|--------|----------|--------------|-------------|
| Cr     | 1:200    | 0.5          | 0.03        |
| Cr     | 1:50     | 2            | 0.66        |
| Cr     | 1:20     | 5            | 1.34        |
| Cr     | 1:10     | 10           | 3.57        |
| Cr     | 3:20     | 15           | 4.89        |
| Cr     | 1:5      | 20           | 6.73        |
| Mn     | 3:20     | 15           | 5.12        |
| Cd     | 3:20     | 15           | 4.96        |
| Bi     | 3:20     | 15           | 4.77        |
| Ce     | 3:20     | 15           | 2.63        |
| Yb     | 3:20     | 15           | 2.84        |
| Sm     | 3:20     | 15           | 2.58        |
| Eu     | 3:20     | 15           | 2.71        |

**Table S2** Atomic coordinates for Cs<sub>2</sub>TeCl<sub>6</sub>.

| Atom | Ox | wyck | site | x/a   | y/b | z/c |
|------|----|------|------|-------|-----|-----|
| Te1  | 4  | 4a   | m-3m | 0     | 0   | 0   |
| Cs1  | 1  | 8c   | -43m | 1/4   | 1/4 | 1/4 |
| Cl1  | -1 | 24e  | 4m.m | 0.264 | 0   | 0   |

**Table S3** Crystallographic data and parameters of the Rietveld refinement of Cs<sub>2</sub>TeCl<sub>6</sub> and Cs<sub>2</sub>TeCl<sub>6</sub>:Cr<sup>3+</sup> MCs.

| Sample                          | Cs <sub>2</sub> TeCl <sub>6</sub> | Cs <sub>2</sub> TeCl <sub>6</sub> :Cr <sup>3+</sup> |
|---------------------------------|-----------------------------------|-----------------------------------------------------|
| 2 $\theta$ range                | 10° ≤ $\theta$ ≤ 70°              |                                                     |
| Temperature (K)                 | 298                               |                                                     |
| Crystal system                  | Cubic                             |                                                     |
| Space group                     | Fm3-m                             |                                                     |
| <i>Z</i>                        | 4                                 |                                                     |
| a = b = c (Å)                   | 10.500                            | 10.473                                              |
| $\alpha = \beta = \gamma$ (deg) | 90                                |                                                     |
| Volume (Å <sup>3</sup> )        | 1157.798                          | 1148.765                                            |
| X-ray source                    | Cu K $\alpha$ 1                   |                                                     |
| Wavelength / Å                  | 1.5406                            |                                                     |
| R <sub>p</sub> (%)              | 6.75                              | 6.25                                                |
| R <sub>wp</sub> (%)             | 6.12                              | 5.68                                                |
| $\chi^2$                        | 1.86                              | 1.68                                                |

**Table S4** Selected bond distances (Å) and angles (deg.) for Cs<sub>2</sub>TeCl<sub>6</sub>.

| Vector       | Length     | Angle       | Degrees    |
|--------------|------------|-------------|------------|
| Te1-Cs1 × 8  | 4.53500(4) | Cl1-Te1-Cl1 | 90.000(0)  |
| Te1-Cl1 × 6  | 2.76947(3) | Cl1-Te1-Cl1 | 180.000(0) |
| Cs1-Cs1 × 6  | 5.23657(6) | Cs1-Cs1-Cl1 | 45.048(0)  |
| Cs1-Cl1 × 12 | 3.70590(3) |             |            |

**Table S5** Selected bond distances (Å) and angles (deg.) for Cs<sub>2</sub>TeCl<sub>6</sub>:Cr<sup>3+</sup>.

| Vector       | Length     | Angle       | Degrees    |
|--------------|------------|-------------|------------|
| Te1-Cs1 × 8  | 4.54686(1) | Cl1-Te1-Cl1 | 90.000(0)  |
| Te1-Cl1 × 6  | 2.57832(1) | Cl1-Te1-Cl1 | 180.000(0) |
| Cs1-Cs1 × 6  | 5.25026(2) | Cs1-Cs1-Cl1 | 45.005(0)  |
| Cs1-Cl1 × 12 | 3.71279(1) |             |            |

**Table S6** The PLQY of Cr<sup>3+</sup> doped Cs<sub>2</sub>TeCl<sub>6</sub> MCs.

| Sample                                                       | PLQY(Vis)<br>[%] |
|--------------------------------------------------------------|------------------|
| Cs <sub>2</sub> TeCl <sub>6</sub>                            | 6.7              |
| Cs <sub>2</sub> TeCl <sub>6</sub> :Cr <sup>3+</sup> (0.03 %) | 11.2             |
| Cs <sub>2</sub> TeCl <sub>6</sub> :Cr <sup>3+</sup> (0.66 %) | 29.3             |
| Cs <sub>2</sub> TeCl <sub>6</sub> :Cr <sup>3+</sup> (1.34 %) | 55.5             |
| Cs <sub>2</sub> TeCl <sub>6</sub> :Cr <sup>3+</sup> (3.57 %) | 73.9             |
| Cs <sub>2</sub> TeCl <sub>6</sub> :Cr <sup>3+</sup> (4.89 %) | 81.5             |
| Cs <sub>2</sub> TeCl <sub>6</sub> :Cr <sup>3+</sup> (6.73%)  | 53.4             |

**Table S7** Photometric results of the WLEDs working at different drive currents.

| Current(mA) | x      | y      | CCT (K) | R <sub>a</sub> |
|-------------|--------|--------|---------|----------------|
| 5           | 0.3217 | 0.3506 | 5893    | 79.3           |
| 15          | 0.3208 | 0.3508 | 5779    | 79.9           |
| 25          | 0.3225 | 0.3503 | 5826    | 81.3           |
| 35          | 0.3216 | 0.3512 | 5801    | 81.7           |
| 45          | 0.3231 | 0.3520 | 5922    | 81.6           |
| 55          | 0.3209 | 0.3497 | 5703    | 81.8           |

**Table S8.** Summary of the optically excited WLEDs performance.

| Emitters                                                                      | CIE<br>(x, y) | CCT<br>(K) | CRI  | luminous<br>efficiency<br>(lm/W) | Ref.         |
|-------------------------------------------------------------------------------|---------------|------------|------|----------------------------------|--------------|
| Cs <sub>2</sub> SnCl <sub>6</sub> :1.1%Bi <sup>3+</sup> /0.2%Te <sup>4+</sup> | (0.34, 0.37)  | 5233       | 73   | -                                | 3            |
| Cs <sub>2</sub> SnCl <sub>6</sub> :Bi <sup>3+</sup> /0.049%Te <sup>4+</sup>   | (0.33, 0.33)  | 5613       | -    | 26.65                            | 4            |
| Cs <sub>2</sub> AgIn <sub>0.883</sub> Bi <sub>0.167</sub> Cl <sub>6</sub>     | (0.42, 0.39)  | 3260       | 87   | -                                | 5            |
| CsCu <sub>2</sub> I <sub>3</sub>                                              | (0.35, 0.36)  | 5035       | -    | -                                | 6            |
| Cs <sub>2</sub> (Na, Ag)InCl <sub>6</sub> :7.09%Ho <sup>3+</sup>              | (0.39, 0.46)  | -          | 75.4 | -                                | 7            |
| Cs <sub>2</sub> HfCl <sub>6</sub> :Bi <sup>3+</sup> /0.01%Te <sup>4+</sup>    | (0.31, 0.32)  | 6866       | 84.5 | 4.25                             | 8            |
| Cs <sub>2</sub> ZrCl <sub>6</sub> :1.5%Sb <sup>3+</sup>                       | (0.32, 0.33)  | 5438       | 96   | -                                | 9            |
| (NH <sub>4</sub> ) <sub>2</sub> SnCl <sub>6</sub> :0.5%Te <sup>4+</sup>       | (0.39, 0.38)  | 3855       | 83   | 31                               | 10           |
| Cs <sub>2</sub> SnCl <sub>6</sub> :2.75%Bi <sup>3+</sup>                      | (0.36, 0.37)  | 4486       | -    | -                                | 11           |
| Cs <sub>2</sub> TeCl <sub>6</sub> :4.89%Cr <sup>3+</sup>                      | (0.32, 0.35)  | 5826       | 81.3 | 19.34                            | This<br>work |

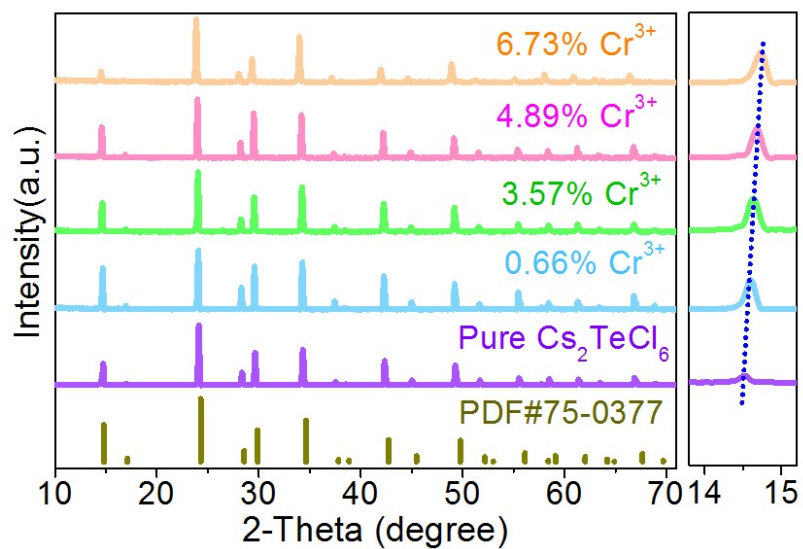

**Fig. S1** XRD patterns of pure  $\text{Cs}_2\text{TeCl}_6$  and various  $\text{Cr}^{3+}$  doped  $\text{Cs}_2\text{TeCl}_6$  MCs.

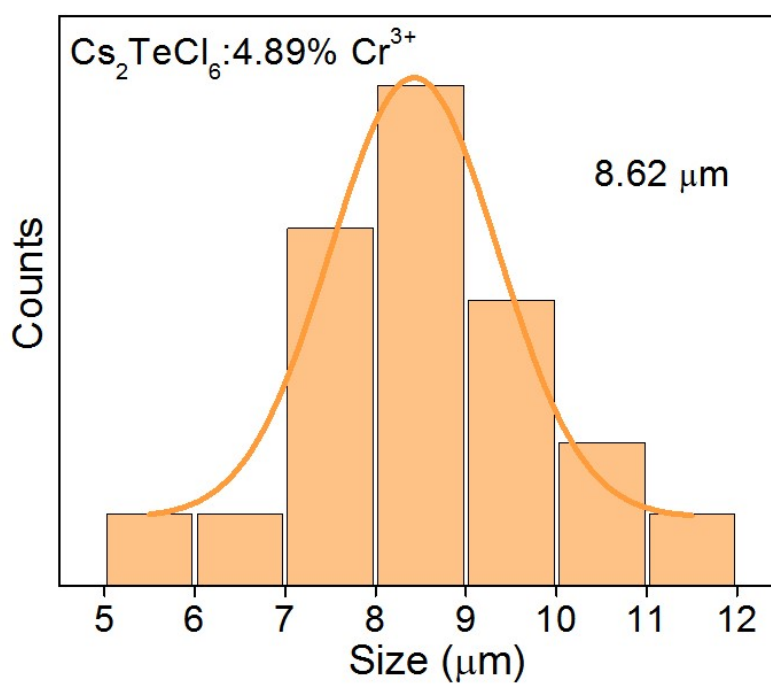

**Fig. S2** Diameter distribution of  $\text{Cs}_2\text{TeCl}_6:\text{Cr}^{3+}$  (4.89 %) MCs.



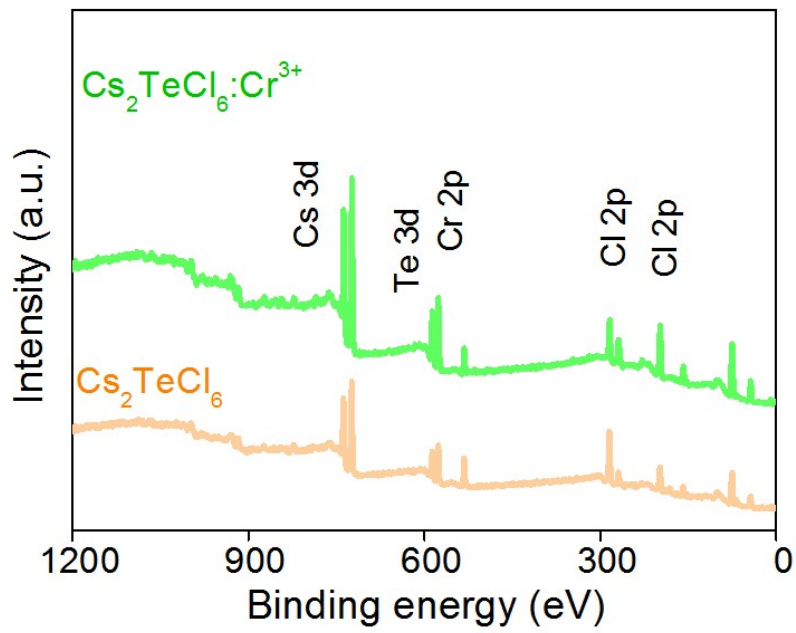

**Fig. S3** High-resolution XPS analysis of pure  $\text{Cs}_2\text{TeCl}_6$  and  $\text{Cs}_2\text{TeCl}_6:\text{Cr}^{3+}$  MCs.

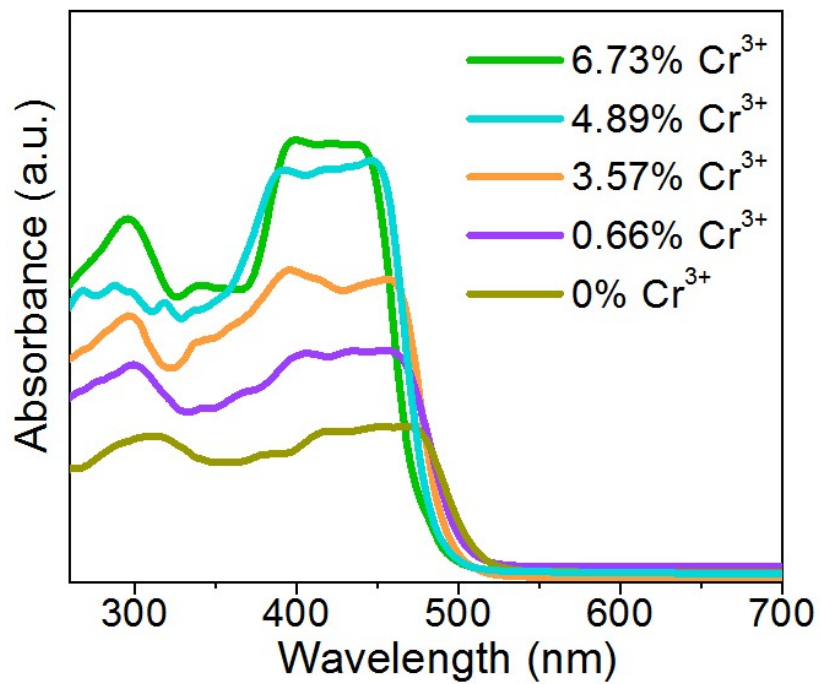

**Fig. S4** Absorption spectra of various  $\text{Cr}^{3+}$  doped  $\text{Cs}_2\text{TeCl}_6$  MCs.

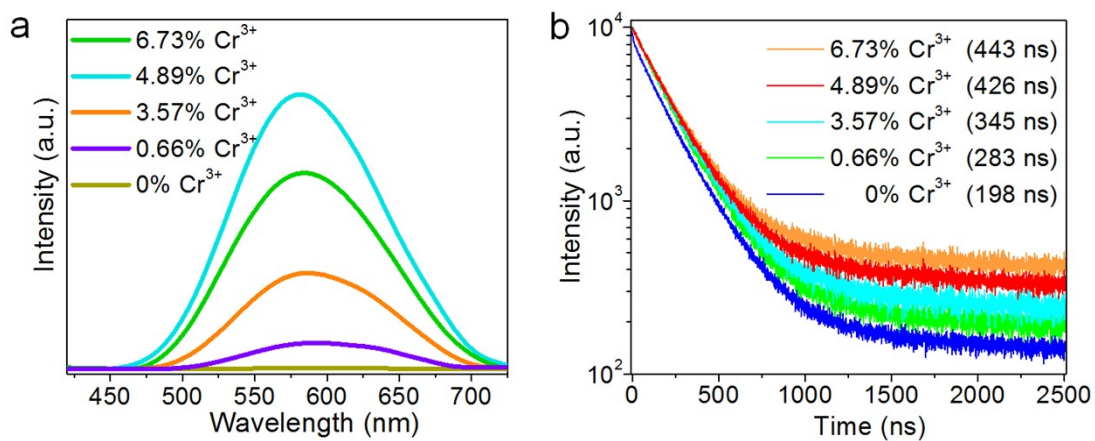

**Fig. S5** (a) Emission spectra. (b) Emission dynamics of pure and various Cr<sup>3+</sup> doped Cs<sub>2</sub>TeCl<sub>6</sub> MCs monitored at 590 nm.

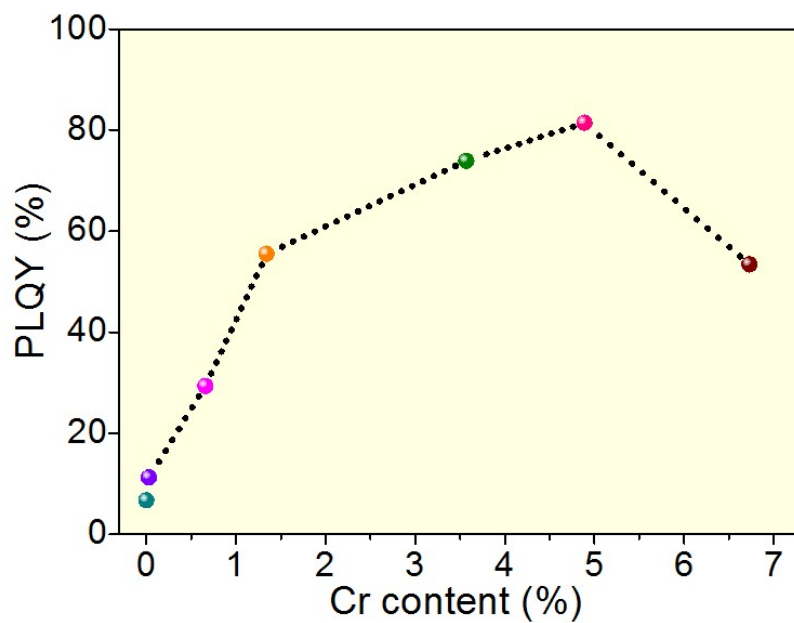

**Fig. S6** PLQY of various Cr<sup>3+</sup> doped Cs<sub>2</sub>TeCl<sub>6</sub> MCs.

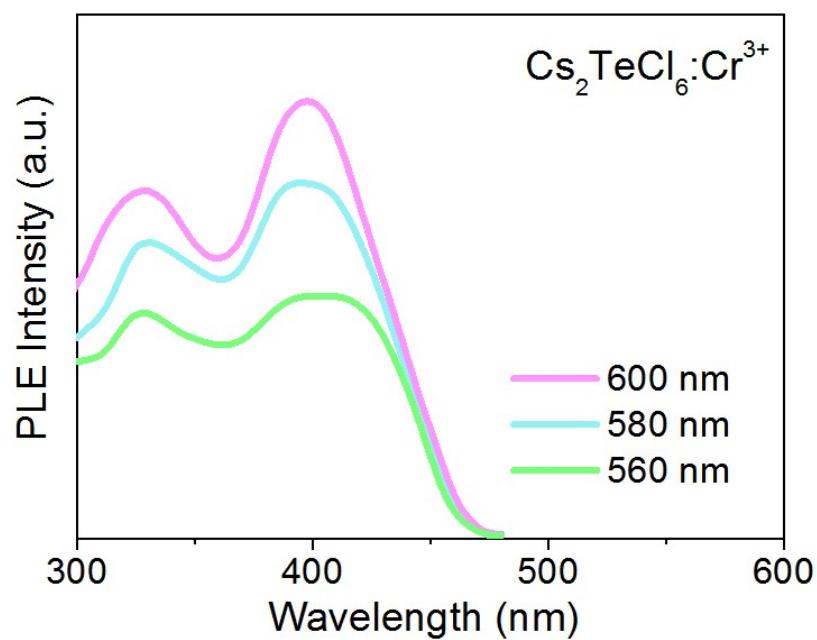

**Fig. S7** The excitation spectra monitored at 560, 580, and 600 nm for  $\text{Cs}_2\text{TeCl}_6:\text{Cr}^{3+}$  MCs.

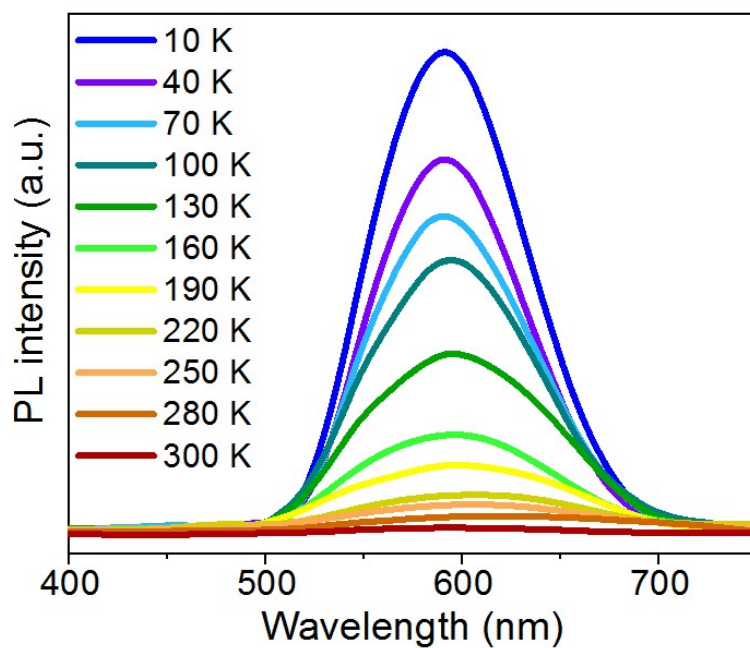

**Fig. S8** Temperature-dependent PL spectra ( $T = 10\text{-}300$  K) for  $\text{Cs}_2\text{TeCl}_6$  MCs.

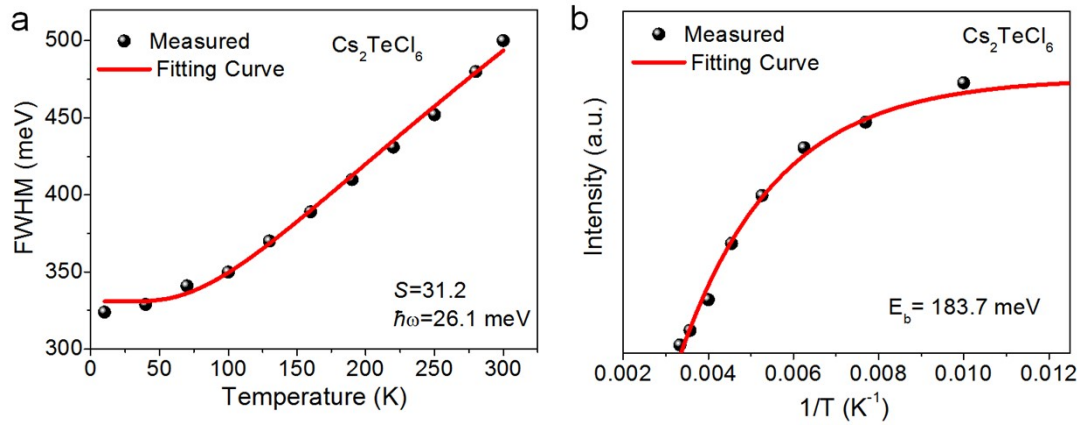

**Fig. S9** (a) Fitting curve of the FWHM as a function of temperature. (b) Extracted PL intensity versus  $1/T$  and the corresponding fitting result.

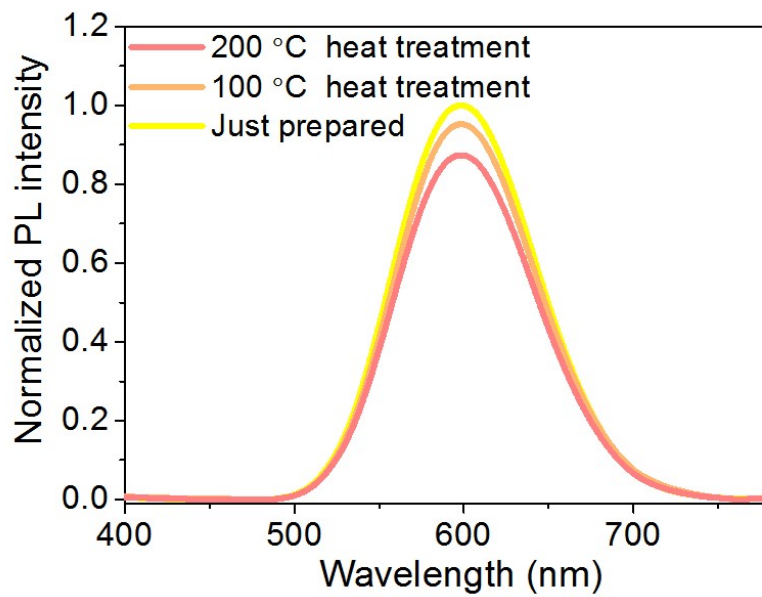

**Fig.S10** Normalized PL spectra of just-prepared and heat-treated  $\text{Cs}_2\text{TeCl}_6:4.89\%\text{Cr}^{3+}$  samples.

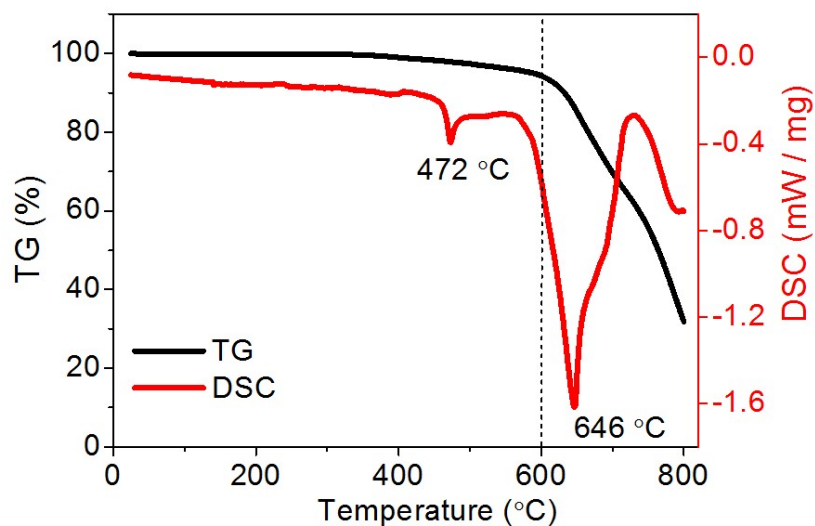

**Fig.S11** TG and DSC curves of  $\text{Cs}_2\text{TeCl}_6:4.89\%\text{Cr}^{3+}$  MCs.

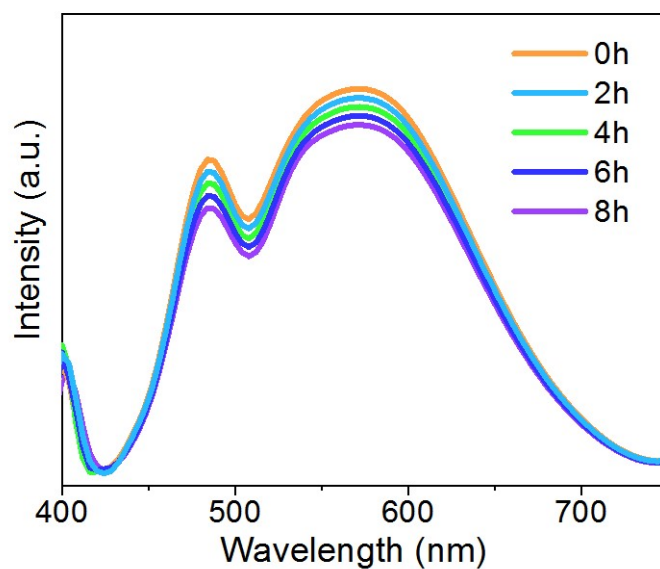

**Fig. S12** EL spectra of the WLEDs at different operating times driven the current of 25 mA.

## References

- 1 Y. Yao, S. W. Zhang, Z. J. Liu, C. Y. Wang, P. Liu, L. Ma, G. D. Wei, F. Y.

- Kang, *RSC Adv.*, 2021, 11 (42), 26415-26420.
- 2 F. Zhang, X. Chen, X. F. Qi, W. Q. Liang, M. Wang, Z. Z. Ma, X. Z. Ji, D. W. Yang, M. C. Jia, D. Wu, X. J. Li, Y. Zhang, Z. F. Shi, C. X. Shan, *Nano Lett.*, 2022, 22 (12), 5046-5054.
  - 3 W. Zhang, W. Zheng, L. Y. Li, P. Huang, Z. L. Gong, Z. W. Zhou, J. Y. Sun, Y. Yu, X. Y. Chen, *Angew. Chem. Int. Ed.*, 2022, 61 (9), e202116085.
  - 4 Y. Zhong, Y. E. Huang, T. Deng, Y. T. Lin, X. Y. Huang, Z. H. Deng, K. Z. Du, *Inorg. Chem.*, 2021, 60 (22), 17357-17363.
  - 5 M. B. Gray, J. D. Majher, T. A. Strom, P. M. Woodward, *Inorg. Chem.*, 2019, 58 (19), 13403-13410.
  - 6 R. C. Lin, Q. L. Guo, Q. Zhu, Y. M. Zhu, W. Zheng, F. Huang, *Adv. Mater.*, 2019, 31 (46), 1905079.
  - 7 S. R. Li, Q. S. Hu, J. J. Luo, T. Jin, J. Liu, J. H. Li, Z. F. Tan, Y. B. Han, Z. Zheng, T. Y. Zhai, H. S. Song, L. Gao, G. D. Niu, J. Tang, *Adv. Opt. Mater.*, 2019, 7 (23), 1901098.
  - 8 W. Yang, P. P. Dang, G. D. Zhang, H. Z. Lian, G. G. Li, J. Lin, *Inorg. Chem.*, 2022, 61 (15), 5903-5911.
  - 9 F. Zhang, X. Chen, X. F. Qi, W. Q. Liang, M. Wang, Z. Z. Ma, X. Z. Ji, D. W. Yang, M. Jia, D. Wu, X. J. Li, Y. Zhang, Z. F. Shi, C. X. Shan, *Nano Lett.*, 2022, 22 (12), 5046-5054.
  - 10 Z. Y. Li, C. Y. Zhang, B. Li, C. Lin, Y. Li, L. Wang, R. J. Xie, *Chem. Eng. J.*, 2021, 420, 129740.
  - 11 Z. F. Tan, J. H. Li, C. Zhang, Z. Li, Q. S. Hu, Z. W. Xiao, T. Kamiya, H. Hosono, G. D. Niu, E. Lifshitz, Y. B. Cheng, J. Tang, *Adv. Funct. Mater.*, 2018, 28 (29), 1801131.
